# Supplementary material for: A novel genomic signature predicting FDG uptake in diverse metastatic tumors
Source: EJNMMI Res. 2018 Jan 18;8:4. doi: 10.1186/s13550-017-0355-3 (PMC5773462; doi:10.1186/s13550-017-0355-3)
Supplement: Supplementary file 8 — List of PLS-3 probes with VIP values equal or greater than 1 along with their regression coefficients. (XLSX 34 kb) [file 13550_2017_355_MOESM8_ESM.xlsx]

## Sheet: Hoja1
ProbeID	Gene symbol	Gene name	Regression Coefficient	probeID	VIP value
A_24_P68222	CD99P1	CD99 molecule pseudogene 1	-1,04	A_24_P68222	2.73868
A_23_P119593	EPHX3	epoxide hydrolase 3	-1,21	A_23_P119593	2.46846
A_23_P90589	MRPL44	mitochondrial ribosomal protein L44	1,50	A_23_P90589	2.36249
A_32_P130536			1,22	A_32_P130536	2.27441
A_23_P79416	FBXO11	F-box protein 11	1,08	A_23_P79416	2.26819
A_23_P68970	ARFGAP3	ADP-ribosylation factor GTPase activating protein 3	1,06	A_23_P68970	2.20421
A_23_P213944	HBEGF	heparin-binding EGF-like growth factor	-1,06	A_23_P213944	2.20166
A_24_P117866	ADD1	adducin 1 (alpha)	-1,08	A_24_P117866	2.19001
A_24_P690235			-1,41	A_24_P690235	2.1658
A_23_P86002	TMED5	transmembrane emp24 protein transport domain containing 5	1,17	A_23_P86002	2.08503
A_23_P374695	TEK	TEK tyrosine kinase, endothelial	-1,01	A_23_P374695	2.06041
A_23_P321703	BCL2A1	BCL2-related protein A1	1,42	A_23_P321703	2.04973
A_23_P344421	ROBO4	roundabout homolog 4, magic roundabout (Drosophila)	-1,01	A_23_P344421	1.94091
A_24_P143171	TMEM47	transmembrane protein 47	-1,12	A_24_P143171	1.91605
A_23_P369987	KIAA0317	KIAA0317	1,05	A_23_P369987	1.87683
A_23_P4798	ZNF581	zinc finger protein 581	1,04	A_23_P4798	1.86777
A_23_P251248	TBCC	tubulin folding cofactor C	1,24	A_23_P251248	1.82918
A_24_P274111	CHI3L1	chitinase 3-like 1 (cartilage glycoprotein-39)	1,33	A_24_P274111	1.82634
A_23_P137665	CHI3L1	chitinase 3-like 1 (cartilage glycoprotein-39)	1,41	A_23_P137665	1.82282
A_32_P38426	C10orf46	chromosome 10 open reading frame 46	-1,12	A_32_P38426	1.81129
A_24_P341279	TRAK1	trafficking protein, kinesin binding 1	-1,04	A_24_P341279	1.8103
A_23_P108157	TJP3	tight junction protein 3 (zona occludens 3)	-1,01	A_23_P108157	1.77033
A_23_P47426	ACAD8	acyl-Coenzyme A dehydrogenase family, member 8	1,09	A_23_P47426	1.75681
A_23_P104798	IL18	interleukin 18 (interferon-gamma-inducing factor)	1,07	A_23_P104798	1.75298
A_23_P115861	ZNF485	zinc finger protein 485	1,33	A_23_P115861	1.74566
A_24_P381555	SAP18	Sin3A-associated protein, 18kDa	-1,09	A_24_P381555	1.74027
A_23_P385034	E2F3	E2F transcription factor 3	1,42	A_23_P385034	1.73854
A_23_P24260	ENTPD1	ectonucleoside triphosphate diphosphohydrolase 1	-1,02	A_23_P24260	1.72999
A_24_P12932	MRPS16	mitochondrial ribosomal protein S16	1,00	A_24_P12932	1.72519
A_24_P867111	LOC283177	hypothetical protein LOC283177	-1,29	A_24_P867111	1.72336
A_24_P316939	LRRFIP1	leucine rich repeat (in FLII) interacting protein 1	-1,05	A_24_P316939	1.70554
A_23_P51187	PRKCZ	protein kinase C, zeta	1,40	A_23_P51187	1.70016
A_24_P277349	SEC31A	SEC31 homolog A (S. cerevisiae)	-1,11	A_24_P277349	1.69977
A_24_P566701	SKP1	S-phase kinase-associated protein 1	-1,08	A_24_P566701	1.68638
A_23_P136683	HLA-DQB1	major histocompatibility complex, class II, DQ beta 1	1,34	A_23_P136683	1.67912
A_23_P423309	PCDH12	protocadherin 12	-1,40	A_23_P423309	1.67502
A_23_P77859	TMEM88	transmembrane protein 88	-1,06	A_23_P77859	1.65738
A_23_P216429	ASPN	asporin	-1,19	A_23_P216429	1.64708
A_23_P420361	C3orf10	chromosome 3 open reading frame 10	-1,48	A_23_P420361	1.63275
A_23_P25194	HRK	harakiri, BCL2 interacting protein (contains only BH3 domain)	1,18	A_23_P25194	1.63207
A_24_P140608	HBEGF	heparin-binding EGF-like growth factor	-1,18	A_24_P140608	1.62787
A_23_P19663	CTGF	connective tissue growth factor	-1,25	A_23_P19663	1.6206
A_23_P408363	ITGBL1	integrin, beta-like 1 (with EGF-like repeat domains)	-1,45	A_23_P408363	1.62034
A_24_P945194	PDCD6IP	programmed cell death 6 interacting protein	-1,82	A_24_P945194	1.61066
A_23_P50426	KANK2	KN motif and ankyrin repeat domains 2	-1,04	A_23_P50426	1.60533
A_23_P126706	ANGPTL1	angiopoietin-like 1	-1,24	A_23_P126706	1.59513
A_23_P13740	NAV3	neuron navigator 3	-1,36	A_23_P13740	1.58906
A_23_P301521	KIAA1462	KIAA1462	-1,50	A_23_P301521	1.58862
A_23_P72387	AFAP1	actin filament associated protein 1	-1,35	A_23_P72387	1.58387
A_32_P192376	ENPP1	ectonucleotide pyrophosphatase/phosphodiesterase 1	-1,09	A_32_P192376	1.58244
A_23_P409386	SLC25A22	solute carrier family 25 (mitochondrial carrier: glutamate), member 22	1,01	A_23_P409386	1.58152
A_24_P46689	SASH1	SAM and SH3 domain containing 1	-1,11	A_24_P46689	1.58118
A_24_P278192	AK1	adenylate kinase 1	-1,29	A_24_P278192	1.57216
A_24_P944827	ATG7	ATG7 autophagy related 7 homolog (S. cerevisiae)	-1,13	A_24_P944827	1.56557
A_24_P390668	FMNL1	formin-like 1	1,14	A_24_P390668	1.56507
A_23_P40975	EDEM1	ER degradation enhancer, mannosidase alpha-like 1	1,36	A_23_P40975	1.55456
A_23_P17769	DDT	D-dopachrome tautomerase	1,23	A_23_P17769	1.55349
A_23_P355295	FMO2	flavin containing monooxygenase 2 (non-functional)	-1,30	A_23_P355295	1.55037
A_24_P781757	LOC148413	hypothetical LOC148413	1,19	A_24_P781757	1.54159
A_23_P51518	RGS5	regulator of G-protein signaling 5	-1,29	A_23_P51518	1.53717
A_23_P24215	TBC1D12	TBC1 domain family, member 12	-1,72	A_23_P24215	1.53158
A_24_P658584	SASH1	SAM and SH3 domain containing 1	-1,16	A_24_P658584	1.52756
A_23_P415401	KLF9	Kruppel-like factor 9	-1,08	A_23_P415401	1.52445
A_23_P213584	HK3	hexokinase 3 (white cell)	1,54	A_23_P213584	1.52026
A_23_P42802	PDIA4	protein disulfide isomerase family A, member 4	1,28	A_23_P42802	1.5173
A_23_P134225	LRRC61	leucine rich repeat containing 61	1,71	A_23_P134225	1.51694
A_23_P60479	DNAJA1	DnaJ (Hsp40) homolog, subfamily A, member 1	1,05	A_23_P60479	1.51409
A_23_P212475	SHISA5	shisa homolog 5 (Xenopus laevis)	-1,17	A_23_P212475	1.49973
A_23_P2601	HSP90B1	heat shock protein 90kDa beta (Grp94), member 1	1,15	A_23_P2601	1.49915
A_24_P944570	PXDN	peroxidasin homolog (Drosophila)	-1,02	A_24_P944570	1.49772
A_24_P283395	ADCK2	aarF domain containing kinase 2	-1,20	A_24_P283395	1.49532
A_23_P501831	C5orf4	chromosome 5 open reading frame 4	-1,02	A_23_P501831	1.49435
A_23_P75978	CLPB	ClpB caseinolytic peptidase B homolog (E. coli)	1,29	A_23_P75978	1.4939
A_23_P502913	WDR1	WD repeat domain 1	-1,44	A_23_P502913	1.49165
A_32_P64928	LOC100287016	similar to destrin	-1,24	A_32_P64928	1.48772
A_32_P142991	PRKAR2A	protein kinase, cAMP-dependent, regulatory, type II, alpha	-1,26	A_32_P142991	1.48421
A_23_P34915	ATF3	activating transcription factor 3	-1,47	A_23_P34915	1.48331
A_23_P161297	OGDHL	oxoglutarate dehydrogenase-like	1,25	A_23_P161297	1.47692
A_24_P178106	YTHDC2	YTH domain containing 2	-1,15	A_24_P178106	1.47284
A_23_P27584	MYADM	myeloid-associated differentiation marker	-1,22	A_23_P27584	1.47099
A_23_P32233	KLF4	Kruppel-like factor 4 (gut)	-1,25	A_23_P32233	1.47021
A_24_P15823			-1,41	A_24_P15823	1.46242
A_23_P164436	ASPA	aspartoacylase (Canavan disease)	-1,22	A_23_P164436	1.45779
A_32_P167239	AFAP1L1	actin filament associated protein 1-like 1	-1,31	A_32_P167239	1.45449
A_24_P186764			-1,03	A_24_P186764	1.44688
A_23_P5550	PUM2	pumilio homolog 2 (Drosophila)	-1,14	A_23_P5550	1.43555
A_32_P100974	RPL24	ribosomal protein L24	-1,27	A_32_P100974	1.43489
A_24_P560909	RNF115	ring finger protein 115	-1,14	A_24_P560909	1.4331
A_23_P42302	HLA-DQA2	major histocompatibility complex, class II, DQ alpha 2	1,35	A_23_P42302	1.42279
A_23_P214425	NFYA	nuclear transcription factor Y, alpha	1,04	A_23_P214425	1.4219
A_23_P165171	TMEM161A	transmembrane protein 161A	1,01	A_23_P165171	1.41337
A_24_P105164	MAGT1	magnesium transporter 1	1,04	A_24_P105164	1.4098
A_23_P93082	NUS1	nuclear undecaprenyl pyrophosphate synthase 1 homolog (S. cerevisiae)	1,06	A_23_P93082	1.40772
A_23_P92903	C1QTNF2	C1q and tumor necrosis factor related protein 2	-1,85	A_23_P92903	1.40718
A_24_P641673			-1,18	A_24_P641673	1.40458
A_24_P227993	UBE2I	ubiquitin-conjugating enzyme E2I (UBC9 homolog, yeast)	-1,14	A_24_P227993	1.39584
A_24_P943781	C7orf58	chromosome 7 open reading frame 58	-1,22	A_24_P943781	1.39462
A_23_P215459	ELN	elastin	-1,05	A_23_P215459	1.39044
A_23_P43283	GPR124	G protein-coupled receptor 124	-1,26	A_23_P43283	1.39039
A_23_P67299	DOCK6	dedicator of cytokinesis 6	-1,32	A_23_P67299	1.38674
A_23_P136573	ST3GAL5	ST3 beta-galactoside alpha-2,3-sialyltransferase 5	1,38	A_23_P136573	1.38596
A_24_P213034			1,05	A_24_P213034	1.38525
A_23_P342654	PALM2-AKAP2	PALM2-AKAP2 readthrough transcript	-1,38	A_23_P342654	1.38196
A_32_P56525	FAM115A	family with sequence similarity 115, member A	-1,08	A_32_P56525	1.37714
A_24_P191971	SAP30L	SAP30-like	-1,15	A_24_P191971	1.37391
A_23_P52552	BAG3	BCL2-associated athanogene 3	-1,18	A_23_P52552	1.37201
A_24_P298834	RPL32P10	ribosomal protein L32 pseudogene 10	-1,08	A_24_P298834	1.36871
A_23_P128384	VPS29	vacuolar protein sorting 29 homolog (S. cerevisiae)	-1,39	A_23_P128384	1.36732
A_24_P193295	RAB15	RAB15, member RAS onocogene family	-1,03	A_24_P193295	1.36499
A_23_P257043	GEM	GTP binding protein overexpressed in skeletal muscle	-1,24	A_23_P257043	1.36425
A_24_P51517	FGR	Gardner-Rasheed feline sarcoma viral (v-fgr) oncogene homolog	1,26	A_24_P51517	1.36243
A_23_P105212	THRSP	thyroid hormone responsive (SPOT14 homolog, rat)	1,06	A_23_P105212	1.36011
A_32_P24832	OLFML3	olfactomedin-like 3	-1,07	A_32_P24832	1.35843
A_32_P43349	LOC400456	hypothetical protein LOC400456	-1,35	A_32_P43349	1.35477
A_23_P101992	MARCO	macrophage receptor with collagenous structure	1,11	A_23_P101992	1.35269
A_24_P375949	RPSAP11	ribosomal protein SA pseudogene 11	-1,41	A_24_P375949	1.34953
A_24_P727868	LOC728003	similar to vesicle-associated membrane protein-associated protein A	-1,43	A_24_P727868	1.34888
A_32_P19840			-1,30	A_32_P19840	1.34639
A_23_P77360	CIAO1	cytosolic iron-sulfur protein assembly 1 homolog (S. cerevisiae)	1,48	A_23_P77360	1.34302
A_24_P419211	MTMR6	myotubularin related protein 6	-1,16	A_24_P419211	1.34189
A_23_P28318	C2orf56	chromosome 2 open reading frame 56	1,57	A_23_P28318	1.34158
A_23_P16908	DHX57	DEAH (Asp-Glu-Ala-Asp/His) box polypeptide 57	1,62	A_23_P16908	1.33777
A_23_P119677	HNRNPL	heterogeneous nuclear ribonucleoprotein L	1,14	A_23_P119677	1.33395
A_24_P219785	CALM3	calmodulin 3 (phosphorylase kinase, delta)	1,40	A_24_P219785	1.33151
A_23_P29257	H1F0	H1 histone family, member 0	-1,00	A_23_P29257	1.32751
A_23_P7337	EDNRA	endothelin receptor type A	-1,17	A_23_P7337	1.326
A_23_P426398	PGAM5	phosphoglycerate mutase family member 5	1,26	A_23_P426398	1.32392
A_23_P418051	LOC339803	hypothetical protein LOC339803	1,26	A_23_P418051	1.32081
A_32_P140656	IL6ST	interleukin 6 signal transducer (gp130, oncostatin M receptor)	-1,14	A_32_P140656	1.31643
A_23_P205841	MYO9A	myosin IXA	-1,02	A_23_P205841	1.316
A_23_P160318	COL16A1	collagen, type XVI, alpha 1	-1,17	A_23_P160318	1.31451
A_23_P50357	ARHGEF18	Rho/Rac guanine nucleotide exchange factor (GEF) 18	1,02	A_23_P50357	1.31198
A_24_P139773	PPP1R8	protein phosphatase 1, regulatory (inhibitor) subunit 8	1,06	A_24_P139773	1.31173
A_23_P44195	MSI2	musashi homolog 2 (Drosophila)	1,46	A_23_P44195	1.3115
A_23_P214789	SNX9	sorting nexin 9	-1,12	A_23_P214789	1.30867
A_32_P353677	ATAD3B	ATPase family, AAA domain containing 3B	1,07	A_32_P353677	1.30719
A_23_P329353	CNRIP1	cannabinoid receptor interacting protein 1	-1,15	A_23_P329353	1.3045
A_23_P144005	C3orf32	chromosome 3 open reading frame 32	-1,26	A_23_P144005	1.3035
A_24_P367329	LOC440292	similar to COMM domain containing 4	-1,25	A_24_P367329	1.30097
A_32_P18251	FUNDC2	FUN14 domain containing 2	-1,27	A_32_P18251	1.29959
A_23_P113777	ITGBL1	integrin, beta-like 1 (with EGF-like repeat domains)	-1,06	A_23_P113777	1.2982
A_32_P198731	NEURL1B	neuralized homolog 1B (Drosophila)	-1,74	A_32_P198731	1.29591
A_32_P128701	USP53	ubiquitin specific peptidase 53	-1,25	A_32_P128701	1.29427
A_23_P166663	APPL1	adaptor protein, phosphotyrosine interaction, PH domain and leucine zipper containing 1	-1,21	A_23_P166663	1.2938
A_23_P63798	KLF6	Kruppel-like factor 6	-1,42	A_23_P63798	1.29001
A_32_P105773	SERBP1	SERPINE1 mRNA binding protein 1	1,08	A_32_P105773	1.2895
A_23_P144807	2017-09-08	septin 8	-1,32	A_23_P144807	1.28607
A_24_P134955	PPP2R5A	protein phosphatase 2, regulatory subunit B', alpha isoform	-1,33	A_24_P134955	1.28554
A_24_P930796	C10orf72	chromosome 10 open reading frame 72	-1,23	A_24_P930796	1.28399
A_24_P484797	CIDECP	cell death-inducing DFFA-like effector c pseudogene	-1,11	A_24_P484797	1.28357
A_24_P221375			-1,03	A_24_P221375	1.2827
A_23_P48217	APOLD1	apolipoprotein L domain containing 1	-1,15	A_23_P48217	1.28093
A_24_P150580	RASL12	RAS-like, family 12	-1,27	A_24_P150580	1.28069
A_24_P410797	KALRN	kalirin, RhoGEF kinase	-1,50	A_24_P410797	1.26797
A_32_P514599			-1,06	A_32_P514599	1.26671
A_24_P406693	P4HA1	prolyl 4-hydroxylase, alpha polypeptide I	1,05	A_24_P406693	1.26587
A_23_P211806	LRRFIP2	leucine rich repeat (in FLII) interacting protein 2	-1,14	A_23_P211806	1.26558
A_23_P335452	ZCCHC24	zinc finger, CCHC domain containing 24	-1,04	A_23_P335452	1.26284
A_24_P408981			-1,41	A_24_P408981	1.26153
A_23_P108054	TMEM86B	transmembrane protein 86B	1,11	A_23_P108054	1.25269
A_32_P220472	ZFAND6	zinc finger, AN1-type domain 6	-1,07	A_32_P220472	1.24963
A_23_P426305	AOC3	amine oxidase, copper containing 3 (vascular adhesion protein 1)	-1,14	A_23_P426305	1.24653
A_24_P376339	CCNL2	cyclin L2	1,08	A_24_P376339	1.24646
A_23_P151368	N6AMT2	N-6 adenine-specific DNA methyltransferase 2 (putative)	-1,00	A_23_P151368	1.24536
A_23_P148297	SH3BGRL	SH3 domain binding glutamic acid-rich protein like	-1,22	A_23_P148297	1.24461
A_23_P168629	RBM28	RNA binding motif protein 28	1,35	A_23_P168629	1.24309
A_23_P51548	MGST3	microsomal glutathione S-transferase 3	-1,38	A_23_P51548	1.2417
A_23_P124084	LOXL1	lysyl oxidase-like 1	-1,12	A_23_P124084	1.24036
A_23_P258151	FGD5	FYVE, RhoGEF and PH domain containing 5	-1,11	A_23_P258151	1.23882
A_23_P28105	TSN	translin	1,02	A_23_P28105	1.23748
A_23_P206661	NQO1	NAD(P)H dehydrogenase, quinone 1	-1,06	A_23_P206661	1.23663
A_23_P304682	EMP2	epithelial membrane protein 2	-1,01	A_23_P304682	1.23568
A_24_P157342	C3orf10	chromosome 3 open reading frame 10	-1,01	A_24_P157342	1.23217
A_23_P324813	BCL6B	B-cell CLL/lymphoma 6, member B (zinc finger protein)	-1,11	A_23_P324813	1.22977
A_23_P395365	ENTPD2	ectonucleoside triphosphate diphosphohydrolase 2	-1,37	A_23_P395365	1.22928
A_23_P93780	HGF	hepatocyte growth factor (hepapoietin A; scatter factor)	-1,28	A_23_P93780	1.22874
A_32_P213418	PLN	phospholamban	-1,19	A_32_P213418	1.22786
A_23_P133656	LAMA4	laminin, alpha 4	-1,13	A_23_P133656	1.22777
A_23_P213000	WDR1	WD repeat domain 1	-1,55	A_23_P213000	1.22668
A_24_P31583	LOC729991-MEF2B	LOC729991-MEF2B readthrough transcript	1,25	A_24_P31583	1.22607
A_32_P169179	MSX2P1	msh homeobox 2 pseudogene 1	-1,16	A_32_P169179	1.22486
A_24_P83544	TCEB1P3	transcription elongation factor B subunit 1 pseudogene 3	-1,08	A_24_P83544	1.223
A_23_P361014	TSHZ3	teashirt zinc finger homeobox 3	-1,05	A_23_P361014	1.22279
A_23_P381577	ZNF25	zinc finger protein 25	-1,08	A_23_P381577	1.22156
A_23_P27656	C19orf48	chromosome 19 open reading frame 48	1,05	A_23_P27656	1.2213
A_23_P201357	ATAD3A	ATPase family, AAA domain containing 3A	1,12	A_23_P201357	1.21817
A_24_P51588	CCNL2	cyclin L2	1,06	A_24_P51588	1.21813
A_24_P393312	KIRREL	kin of IRRE like (Drosophila)	-1,08	A_24_P393312	1.21608
A_24_P237778	MAN1C1	mannosidase, alpha, class 1C, member 1	-1,03	A_24_P237778	1.21104
A_23_P20566	TPM2	tropomyosin 2 (beta)	-1,24	A_23_P20566	1.20925
A_24_P418386	LOC644422	similar to arginine/serine-rich splicing factor 6	1,19	A_24_P418386	1.2089
A_23_P52298	NPM3	nucleophosmin/nucleoplasmin 3	1,09	A_23_P52298	1.20798
A_24_P217572	EDNRA	endothelin receptor type A	-1,33	A_24_P217572	1.20666
A_23_P168576	POMZP3	POM (POM121 homolog, rat) and ZP3 fusion	1,16	A_23_P168576	1.20466
A_23_P45106	QRICH1	glutamine-rich 1	-1,09	A_23_P45106	1.20093
A_24_P368023	TCAF1	TRPM8 channel associated factor 1	-1,11	A_24_P368023	1.20092
A_23_P70719	LAMA2	laminin, alpha 2	-1,04	A_23_P70719	1.19907
A_23_P46045	RGS5	regulator of G-protein signaling 5	-1,19	A_23_P46045	1.19308
A_23_P6688	ANO10	anoctamin 10	-1,42	A_23_P6688	1.19024
A_23_P151870	GLCE	glucuronic acid epimerase	-1,04	A_23_P151870	1.18956
A_23_P423012	DUSP27	dual specificity phosphatase 27 (putative)	-1,10	A_23_P423012	1.18951
A_24_P929570	RAPH1	Ras association (RalGDS/AF-6) and pleckstrin homology domains 1	-1,10	A_24_P929570	1.18654
A_23_P112652	CNOT10	CCR4-NOT transcription complex, subunit 10	-1,07	A_23_P112652	1.18479
A_24_P152188	PRICKLE2	prickle homolog 2 (Drosophila)	-1,16	A_24_P152188	1.18398
A_23_P103765	FCER1A	Fc fragment of IgE, high affinity I, receptor for; alpha polypeptide	-1,06	A_23_P103765	1.18392
A_24_P109652	SGK269	NKF3 kinase family member	-1,50	A_24_P109652	1.18249
A_23_P63908	TRUB1	TruB pseudouridine (psi) synthase homolog 1 (E. coli)	-1,13	A_23_P63908	1.17778
A_24_P286054	ZFYVE16	zinc finger, FYVE domain containing 16	-1,07	A_24_P286054	1.17777
A_23_P110504	CLPTM1L	CLPTM1-like	1,51	A_23_P110504	1.17089
A_23_P100469	TXNL4B	thioredoxin-like 4B	1,09	A_23_P100469	1.16989
A_23_P74914	URB2	URB2 ribosome biogenesis 2 homolog (S. cerevisiae)	1,03	A_23_P74914	1.16913
A_23_P90062	DNAJB1	DnaJ (Hsp40) homolog, subfamily B, member 1	-1,31	A_23_P90062	1.15371
A_23_P81399	SQSTM1	sequestosome 1	-1,04	A_23_P81399	1.15352
A_23_P55107	ULK2	unc-51-like kinase 2 (C. elegans)	-1,06	A_23_P55107	1.15285
A_23_P58796	RGMB	RGM domain family, member B	-1,03	A_23_P58796	1.15272
A_23_P423695	MXD4	MAX dimerization protein 4	-1,28	A_23_P423695	1.15156
A_24_P358116			1,01	A_24_P358116	1.15119
A_24_P105933	VIPR1	vasoactive intestinal peptide receptor 1	-1,66	A_24_P105933	1.14837
A_23_P70060	PPAP2A	phosphatidic acid phosphatase type 2A	-1,04	A_23_P70060	1.14797
A_23_P334103	LOH12CR1	loss of heterozygosity, 12, chromosomal region 1	1,03	A_23_P334103	1.14716
A_24_P298877	C1orf174	chromosome 1 open reading frame 174	1,12	A_24_P298877	1.14544
A_23_P89798	FECH	ferrochelatase (protoporphyria)	1,01	A_23_P89798	1.14528
A_23_P148204	USP47	ubiquitin specific peptidase 47	-1,26	A_23_P148204	1.14429
A_23_P168080	SKIV2L	superkiller viralicidic activity 2-like (S. cerevisiae)	1,16	A_23_P168080	1.14313
A_23_P2831	EDNRB	endothelin receptor type B	-1,06	A_23_P2831	1.1414
A_23_P360340	UACA	uveal autoantigen with coiled-coil domains and ankyrin repeats	-1,26	A_23_P360340	1.14124
A_23_P162256	DENR	density-regulated protein	1,03	A_23_P162256	1.13801
A_24_P391431	TAF9B	TAF9B RNA polymerase II, TATA box binding protein (TBP)-associated factor, 31kDa	-1,07	A_24_P391431	1.1369
A_23_P155049	APOL6	apolipoprotein L, 6	1,03	A_23_P155049	1.13333
A_24_P920319	ZBED5	zinc finger BED-type containing 5	-1,05	A_24_P920319	1.13222
A_24_P153803	RHOJ	ras homolog gene family, member J	-1,04	A_24_P153803	1.1303
A_23_P58647	CTNNA1	catenin (cadherin-associated protein), alpha 1, 102kDa	-1,52	A_23_P58647	1.12968
A_23_P23017	C1orf123	chromosome 1 open reading frame 123	-1,34	A_23_P23017	1.12866
A_23_P25313	BRI3BP	BRI3 binding protein	1,16	A_23_P25313	1.12761
A_23_P211659	CERK	ceramide kinase	1,50	A_23_P211659	1.12703
A_23_P318420	CTTNBP2NL	CTTNBP2 N-terminal like	-1,09	A_23_P318420	1.12663
A_23_P19510	HLA-DQB2	major histocompatibility complex, class II, DQ beta 2	1,08	A_23_P19510	1.12613
A_24_P351420	ZDHHC3	zinc finger, DHHC-type containing 3	-1,15	A_24_P351420	1.12336
A_24_P47182	VCL	vinculin	-1,64	A_24_P47182	1.12243
A_23_P212728	TBC1D23	TBC1 domain family, member 23	-1,08	A_23_P212728	1.12236
A_24_P333857	SGIP1	SH3-domain GRB2-like (endophilin) interacting protein 1	-1,11	A_24_P333857	1.12182
A_23_P47077	BAG3	BCL2-associated athanogene 3	-1,02	A_23_P47077	1.12101
A_24_P142151	LRRC28	leucine rich repeat containing 28	-1,01	A_24_P142151	1.12059
A_23_P414273	C5orf62	chromosome 5 open reading frame 62	-1,27	A_23_P414273	1.11928
A_24_P291978	ADCK2	aarF domain containing kinase 2	-1,13	A_24_P291978	1.11868
A_23_P203075	USP28	ubiquitin specific peptidase 28	1,05	A_23_P203075	1.11607
A_23_P253561	TTPAL	tocopherol (alpha) transfer protein-like	1,40	A_23_P253561	1.11603
A_23_P123022	YWHAG	tyrosine 3-monooxygenase/tryptophan 5-monooxygenase activation protein, gamma polypeptide	1,02	A_23_P123022	1.11567
A_24_P358245	LOC158381	ATPase, Class I, type 8B family pseudogene	-1,20	A_24_P358245	1.11538
A_23_P500364	BCL7B	B-cell CLL/lymphoma 7B	-1,10	A_23_P500364	1.11479
A_23_P391906	TMEM200A	transmembrane protein 200A	-1,04	A_23_P391906	1.11287
A_24_P272313	C2orf55	chromosome 2 open reading frame 55	-1,53	A_24_P272313	1.10809
A_23_P71053	MPP6	membrane protein, palmitoylated 6 (MAGUK p55 subfamily member 6)	1,03	A_23_P71053	1.10756
A_24_P103803	B4GALT1	UDP-Gal:betaGlcNAc beta 1,4- galactosyltransferase, polypeptide 1	1,01	A_24_P103803	1.10241
A_23_P150053	ACTA2	actin, alpha 2, smooth muscle, aorta	-1,21	A_23_P150053	1.09883
A_24_P408424	MYH9	myosin, heavy chain 9, non-muscle	-1,27	A_24_P408424	1.09833
A_24_P101248	PARD3B	par-3 family cell polarity regulator beta	-1,43	A_24_P101248	1.09773
A_32_P226907	LOC284112	Homo sapiens cDNA FLJ25640 fis, clone STM04823. [AK098506]	-1,15	A_32_P226907	1.09771
A_23_P120270	MCFD2	multiple coagulation factor deficiency 2	1,11	A_23_P120270	1.09765
A_24_P38895	H2AFX	H2A histone family, member X	1,00	A_24_P38895	1.09743
A_24_P344053	SIPA1L1	signal-induced proliferation-associated 1 like 1	1,18	A_24_P344053	1.09594
A_23_P44505	KLF11	Kruppel-like factor 11	-1,01	A_23_P44505	1.0894
A_23_P105144	SCUBE2	signal peptide, CUB domain, EGF-like 2	-1,23	A_23_P105144	1.08779
A_24_P313186	CALM1	calmodulin 1 (phosphorylase kinase, delta)	-1,04	A_24_P313186	1.08694
A_24_P75708	LOC390996	cofilin 1 pseudogene 6	-1,17	A_24_P75708	1.08589
A_32_P8402	SYNCRIP	synaptotagmin binding, cytoplasmic RNA interacting protein	1,14	A_32_P8402	1.0827
A_23_P217637	TIMM8A	translocase of inner mitochondrial membrane 8 homolog A (yeast)	1,66	A_23_P217637	1.07805
A_24_P64401	LOC84856	hypothetical LOC84856	1,02	A_24_P64401	1.07568
A_23_P96965	SYNC	syncoilin, intermediate filament protein	-1,08	A_23_P96965	1.07543
A_23_P15123	UBFD1	ubiquitin family domain containing 1	1,14	A_23_P15123	1.07521
A_23_P27894	SAFB2	scaffold attachment factor B2	1,32	A_23_P27894	1.07306
A_23_P58622	UBE2D2	ubiquitin-conjugating enzyme E2D 2 (UBC4/5 homolog, yeast)	-1,10	A_23_P58622	1.06899
A_23_P60517	FXN	frataxin	1,27	A_23_P60517	1.06817
A_24_P941167	APOL6	apolipoprotein L, 6	1,01	A_24_P941167	1.06801
A_23_P257144	PXDN	peroxidasin homolog (Drosophila)	-1,03	A_23_P257144	1.06398
A_23_P385206	STX12	syntaxin 12	-1,10	A_23_P385206	1.06359
A_23_P104651	CDCA5	cell division cycle associated 5	1,01	A_23_P104651	1.06138
A_23_P163408	SCAPER	S-phase cyclin A-associated protein in the ER	-1,23	A_23_P163408	1.06129
A_23_P310094	SYNPO2	synaptopodin 2	-1,28	A_23_P310094	1.05164
A_32_P139654	SS18L1	synovial sarcoma translocation gene on chromosome 18-like 1	1,04	A_32_P139654	1.05158
A_23_P125788	TCEAL7	transcription elongation factor A (SII)-like 7	-1,41	A_23_P125788	1.05153
A_24_P92367	YDJC	YdjC homolog (bacterial)	1,15	A_24_P92367	1.05032
A_23_P103672	NES	nestin	-1,40	A_23_P103672	1.04889
A_32_P118586	FAM116A	family with sequence similarity 116, member A	-1,59	A_32_P118586	1.04694
A_24_P233917	KIAA0494	KIAA0494	-1,37	A_24_P233917	1.04693
A_23_P151267	LIMA1	LIM domain and actin binding 1	-1,07	A_23_P151267	1.04671
A_24_P944040	RRP1B	ribosomal RNA processing 1 homolog B (S. cerevisiae)	1,03	A_24_P944040	1.04664
A_23_P29303	RRP7A	ribosomal RNA processing 7 homolog A (S. cerevisiae)	1,49	A_23_P29303	1.04263
A_23_P80129	RRP1	ribosomal RNA processing 1 homolog (S. cerevisiae)	1,02	A_23_P80129	1.04036
A_24_P162929	FAM119A	family with sequence similarity 119, member A	1,14	A_24_P162929	1.03842
A_24_P230675	SOCS2	suppressor of cytokine signaling 2	-1,18	A_24_P230675	1.03837
A_23_P130304	TXNL4A	thioredoxin-like 4A	1,10	A_23_P130304	1.03722
A_24_P39101	KCTD10	potassium channel tetramerisation domain containing 10	-1,36	A_24_P39101	1.03617
A_24_P256603	LYRM7	Lyrm7 homolog (mouse)	-1,49	A_24_P256603	1.03603
A_24_P24685	LOC729595	similar to high mobility group box 3	1,12	A_24_P24685	1.03565
A_23_P209954	GNLY	granulysin	1,29	A_23_P209954	1.0354
A_23_P107257	SPOP	speckle-type POZ protein	-1,30	A_23_P107257	1.03507
A_23_P64010	MTCH2	mitochondrial carrier homolog 2 (C. elegans)	1,24	A_23_P64010	1.03495
A_24_P86993	JAM3	junctional adhesion molecule 3	-1,10	A_24_P86993	1.0345
A_32_P93807			1,03	A_32_P93807	1.0311
A_23_P15174	MT1F	metallothionein 1F	1,26	A_23_P15174	1.03055
A_24_P84808	RPL7P50	ribosomal protein L7 pseudogene 50	-1,01	A_24_P84808	1.02884
A_23_P301304	FGFR1	fibroblast growth factor receptor 1	-1,42	A_23_P301304	1.02723
A_24_P21727	C11orf57	chromosome 11 open reading frame 57	1,23	A_24_P21727	1.02427
A_23_P133216	NLN	neurolysin (metallopeptidase M3 family)	1,10	A_23_P133216	1.02121
A_32_P42574	C1orf198	chromosome 1 open reading frame 198	-1,01	A_32_P42574	1.01969
A_23_P433188	GZF1	GDNF-inducible zinc finger protein 1	-1,21	A_23_P433188	1.01967
A_23_P209669	NRP2	neuropilin 2	-1,26	A_23_P209669	1.019
A_24_P253676			-1,09	A_24_P253676	1.01754
A_23_P77228	CRTC3	CREB regulated transcription coactivator 3	-1,16	A_23_P77228	1.01751
A_23_P31124	COL21A1	collagen, type XXI, alpha 1	-1,22	A_23_P31124	1.0158
A_24_P943613	TBC1D1	TBC1 (tre-2/USP6, BUB2, cdc16) domain family, member 1	-1,29	A_24_P943613	1.01291
A_24_P98249	TACC1	transforming, acidic coiled-coil containing protein 1	-1,26	A_24_P98249	1.01285
A_23_P215406	RAC1	ras-related C3 botulinum toxin substrate 1 (rho family, small GTP binding protein Rac1)	-1,23	A_23_P215406	1.00984
A_24_P608330	CTNNB1	Catenin beta 1	-1,14	A_24_P608330	1.00959
A_24_P592012	ZBTB46	zinc finger and BTB domain containing 46	-1,08	A_24_P592012	1.00948
A_23_P116187	BCO2	beta-carotene oxygenase 2	1,30	A_23_P116187	1.00849
A_23_P14124	RASL11A	RAS-like, family 11, member A	-1,05	A_23_P14124	1.00603
A_24_P307424			1,03	A_24_P307424	1.00476
A_23_P95027	ANKRD39	ankyrin repeat domain 39	1,13	A_23_P95027	1.00038
